# Supplementary material
Source: PubMed Central journal article supplement (PMC275568)

Supplementary table 1: Putative iron uptake systems

| Genes            | Characteristics                                                                  |
|------------------|----------------------------------------------------------------------------------|
| DIP0108-DIP0111  | Putative DtxR-regulated operon siderophore-dependent iron uptake system. Irp6A.  |
| DIP0282 -DIP0284 | ABC transporter                                                                  |
| DIP0582-DIP0594  | ABC transporter                                                                  |
| DIP0613-DIP0619  | ABC transporter; DIP0619 is 35% identical to DtxR.                               |
| DIP0625-DIP0629  | Hmu (hemin) gene cluster; ABC transporter. Present in <i>C. glutamicum</i>       |
| DIP1059-DIP1063  | Iron-siderophore uptake system. ABC transporter. Present in <i>C. glutamicum</i> |
| DIP1082-DIP1087  | ABC transporter                                                                  |

Supplementary table 2: Putative sortases

| CDS      | Length (aa) | Database similarities                                                                                                                                                                                            |
|----------|-------------|------------------------------------------------------------------------------------------------------------------------------------------------------------------------------------------------------------------|
| DIP0233* | 329         | <i>Actinomyces naeslundii</i> putative fimbrial associated protein (EMBL:U85709)<br><i>Staphylococcus aureus</i> sortase StrA (EMBL:AF162687)                                                                    |
| DIP0236* | 312         | <i>A. naeslundii</i> putative fimbria associated protein (EMBL:AF019629)<br><i>S. aureus</i> sortase StrA (EMBL:AF162687)                                                                                        |
| DIP2012* | 289         | <i>Actinomyces viscosus</i> sortase-like protein (EMBL:AF106034)<br><i>Streptococcus pneumoniae</i> putative sortase (EMBL:AE007358)                                                                             |
| DIP2224* | 348         | <i>A. naeslundii</i> putative fimbria-associated protein (EMBL: AF019629)<br><i>S. aureus</i> sortase StrA (EMBL:AF162687)                                                                                       |
| DIP2225* | 318         | <i>A. naeslundii</i> putative fimbria-associated protein (EMBL: AF019629)<br><i>S. aureus</i> sortase StrA (EMBL:AF162687)                                                                                       |
| DIP2272  | 273         | <i>Clostridium acetobutylicum</i> sortase CAC0204 (EMBL: AE007533)<br><i>A. naeslundii</i> putative fimbria-associated protein (EMBL: AF019629)<br><i>S. pneumoniae</i> sortase, putative SP0466 (EMBL:AE007358) |

\* Situated within anomalous G+C content/GC skew regions

Supplementary table 3: CDSs containing potential sortase recognition motifs

| CDS      | CDS length (aa) | Potential sortase recognition motif | C-terminal Signal peptide length (aa) | Database similarities                                                                                                                                              |
|----------|-----------------|-------------------------------------|---------------------------------------|--------------------------------------------------------------------------------------------------------------------------------------------------------------------|
| DIP0235* | 490             | LTMPG                               | 23                                    | <i>Actinomyces viscosus</i> type-1 fimbrial major subunit precursor FimP (EMBL:AF10634)                                                                            |
| DIP0237* | 263             | LALTG                               | 23                                    | No significant database matches                                                                                                                                    |
| DIP0238* | 1039            | LPKTG                               | 23                                    | Very weak similarity to <i>Actinomyces</i> fimbrial proteins                                                                                                       |
| DIP0239* | 149             | LPSTG                               | ND                                    | Pseudogene                                                                                                                                                         |
| DIP0278  | 1080            | LARTG                               | 18                                    | Low similarity to <i>S. aureus</i> Ser-Asp rich fibrinogen-binding, bone sialoprotein-binding protein SdrE (EMBL:AP003359)                                         |
| DIP0443* | 284             | LPDTG                               | 23                                    | No significant database matches                                                                                                                                    |
| DIP1724  | 1075            | LANTG                               | 22                                    | No significant database matches. Contains also a putative TAT recognition motif (RRVFAS)                                                                           |
| DIP2010* | 1872            | LPLTG                               | 22                                    | <i>A. viscosus</i> putative usher-like protein precursor (EMBL:AF106034)<br><i>A. naeslundii</i> putative fimbrial associated protein (EMBL:U85708)                |
| DIP2011* | 205             | LAFTG                               | 22                                    | No significant database matches                                                                                                                                    |
| DIP2013* | 525             | LPLTG                               | 19                                    | <i>A. naeslundii</i> fimbrial subunit type 2 precursor (SW:FM2_ACTNA) and type-1 fimbrial major subunit precursor FimP (EMBL:AF107019)                             |
| DIP2062  | 623             | LAATG                               | 22                                    | <i>Streptococcus agalactiae</i> BPS protein precursor Sar5 (EMBL:AJ133114)<br><i>Staphylococcus epidermidis</i> putative cell-surface adhesin SdrF (EMBL:AF245041) |

|          |      |       |    |                                                                                                                                              |
|----------|------|-------|----|----------------------------------------------------------------------------------------------------------------------------------------------|
| DIP2066* | 1080 | LPKTG | 23 | Low similarity to <i>A. naeslundii</i> putative fimbrial associated protein (EMBL:U85708)                                                    |
| DIP2093* | 951  | LAATG | 23 | Low similarity to <i>S. aureus</i> Ser-Asp rich fibrinogen-binding, bone sialoprotein-binding protein SdrC (EMBL:AP003131)                   |
| DIP2223* | 269  | LGNTG | 22 | No significant database matches                                                                                                              |
| DIP2226* | 555  | LPLTG | 23 | <i>A. naeslundii</i> fimbrial subunit type 2 precursor (SW:FM2_ACTNA)<br><i>A. viscosus</i> fimbrial subunit type 1 precursor (SW:FM1_ACTVI) |
| DIP2227* | 1375 | LPLTG | 23 | <i>A. naeslundii</i> hypothetical protein (EMBL:AJ401093)                                                                                    |
| DIP2325  | 879  | LAETG | 22 | No significant database matches                                                                                                              |
| DIP2370  | 904  | LLSTG | 23 | Low similarity to <i>M. tuberculosis</i> hypothetical Rv3909 (EMBL:Z94121)                                                                   |

\* Situated within anomalous G+C content/GC skew regions

Supplementary Figure 1. ACT comparison showing location of orthologous genes between *Mycobacterium tuberculosis* and *Corynebacterium diphtheriae*. The top panel shows the G+C content of *C. diphtheriae*, plotted over a 20kb window with the base-pair numbers below. The central panel shows the positions of pairs of orthologous genes between the genomes (as calculated by reciprocal best FASTA matches). The bottom panel shows the G+C content of *M. tuberculosis*, plotted over a 20kb window, with the base-pair numbers above.

GC Content (%) Window size: 20000

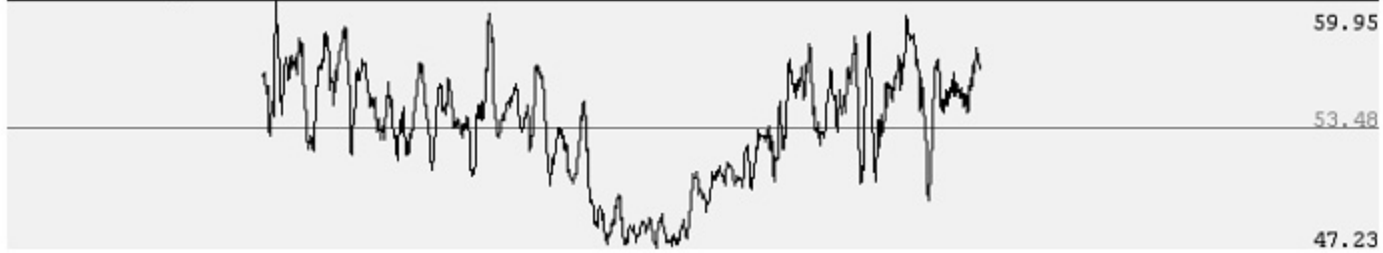

524900 1049800 1574700 2099600

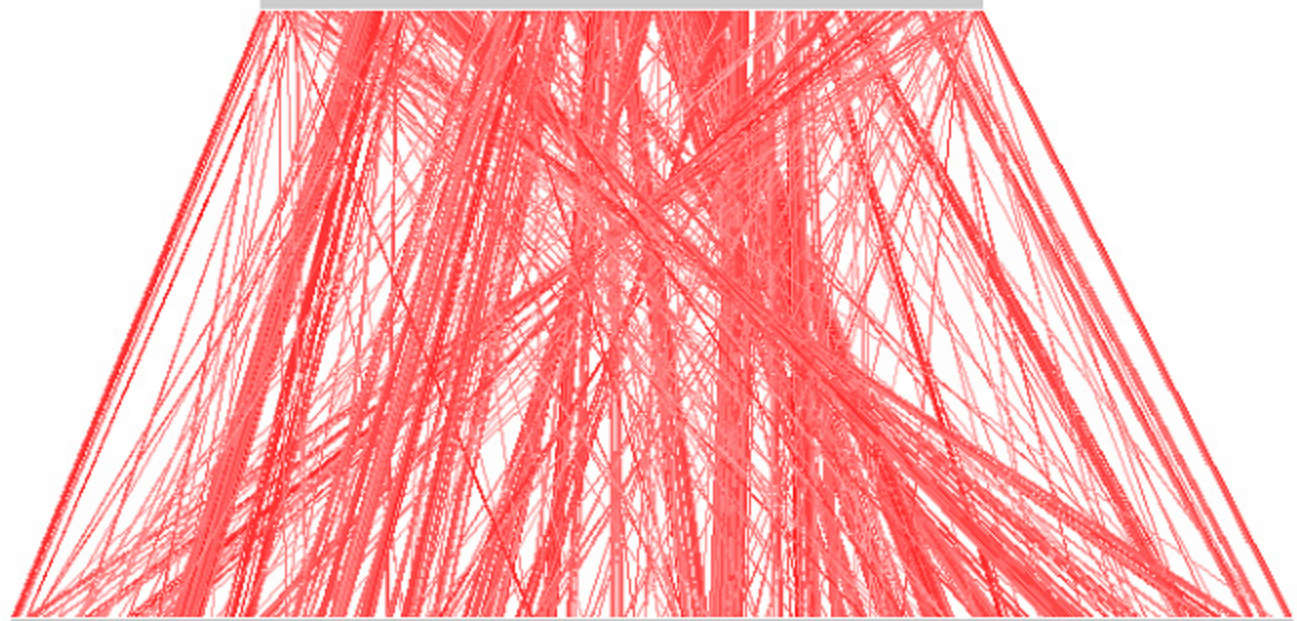

524900 1049800 1574700 2099600 2624500 3149400 3674300 4199200

GC Content (%) Window size: 20000

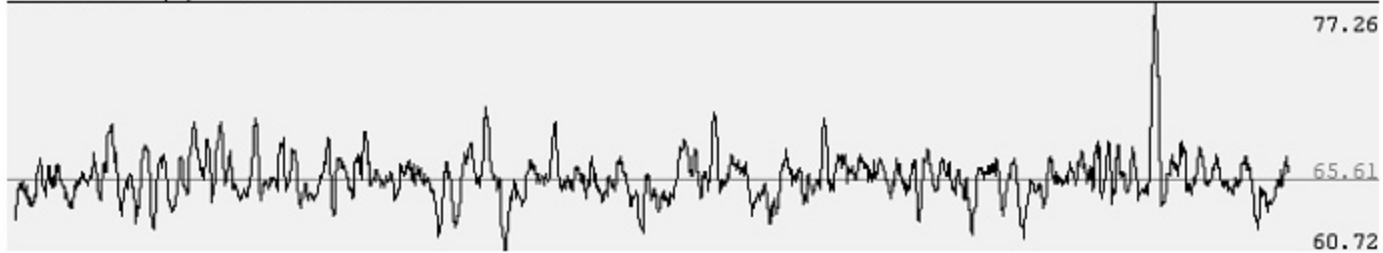

Supplement: nar_31_22_6516__1.pdf [file nar_31_22_6516__1.pdf]
